# Supplementary material for: Synthesis and structural characterization of the first completely alkyl-substituted Ga–Sb Lewis acid–base adducts †
Source: Royal Society of Chemistry journal article supplement (doi:10.1039/a908969a), 2000-01-01
Supplement: a908969a.doc [file a908969a.doc]

Experimental data for adducts **2** - **4** and **6**- **8**:

**(*n*-Bu3)Ga(Sb(*n*-Pr)3) (2)**:Elemental analysis (C21H48GaSb, M = 492.1 g/mol): found (calc.): C: 51.14 (51.26); H: 9.70 (9.83). 1H NMR (300 MHz, C6D5H, 25°C): ** = 0.66 (m, 2H, Ga*CH*2CH2CH2CH3), 0.92 (t, 3JHH = 7.1 Hz, 3H, GaCH2CH2CH2*CH*3), 0.98 (t, 3JHH = 7.1 Hz, 3H, SbCH2CH2*CH*3), 1.33 (m, 2H, Sb*CH*2CH2CH3), 1.40 – 1.55 (m, 4H, GaCH2*CH2*CH2CH3 and SbCH2*CH*2CH3), 1.61 (m, 2H, GaCH2CH2*CH2*CH3). 13C{1H} NMR (80 MHz, C6D5H, 25°C): ** = 14.5 (GaCH2CH2CH2*C*H3), 15.6 (Sb*C*H2CH2CH3), 16.9 (Ga*C*H2CH2CH2CH3), 18.3 (SbCH2CH2*C*H3), 21.3 (SbCH2*C*H2CH3), 28.8 (GaCH2*C*H2CH2CH3), 31.0 (GaCH2C*H*2*C*H2CH3). EI-MS (m/z, %) 250 (30) [*n*-Pr3Sb+], 240 (35) [*n*-Bu3Ga+], 57 (100) [*n*-Bu+].

**(*n*-Bu3)Ga(Sb(*i*-Pr)3) (3)**: Elemental analysis (C21H48GaSb, M = 492.1 g/mol): found (calc.): C: 51.20 (51.26); H: 9.72 (9.83). mp: ca –10°C. 1H NMR (300 MHz, C6D5H, 25°C): ** = 0.74 (m, 2H, Ga*CH*2CH2CH2CH3), 1.02 (t, 3JHH = 7.2 Hz, 3H, GaCH2CH2CH2*CH*3), 1.22 (d, 3JHH = 7.3 Hz, 6H, SbCH(*CH*3)2), 1.50 (m, 2H, GaCH2*CH2*CH2CH3), 1.69 (m, 2H, GaCH2CH2*CH2*CH3), 1.78 (sept, 3JHH = 7.3 Hz, 1H, Sb*CH*(CH3)2). 13C{1H} NMR (80 MHz, C6D5H, 25°C): ** = 14.5 (GaCH2CH2CH2*C*H3), 16.6 (Ga*C*H2CH2CH2CH3), 18.2 (Sb*C*H(CH3)2), 22.4 (SbCH(*C*H3)2), 28.9 (GaCH2*C*H2CH2CH3), 30.9 (GaCH2C*H*2*C*H2CH3). EI-MS (m/z, %) 250 (45) [*i*-Pr3Sb+], 240 (40) [*n*-Bu3Ga+], 57 (100) [*n*-Bu+].

**(*n*-Bu3)Ga(Sb(*t*-Bu)3) (4)**: Elemental analysis (C24H54GaSb, M = 534.1 g/mol): found (calc.): C: 53.94 (53.97); H: 10.17 (10.19). mp: ca –10°C. 1H NMR (300 MHz, C6D5H, 25°C): ** = 0.80 (m, 2H, Ga*CH*2CH2CH2CH3), 1.02 (t, 3JHH = 7.3 Hz, 3H, GaCH2CH2CH2*CH*3), 1.29 (s, 18H, *t*-Bu), 1.51 (m, 2H, GaCH2*CH2*CH2CH3), 1.72 (m, 2H, Ga*CH2*CH2CH2CH3). 13C{1H} NMR (80 MHz, C6D5H, 25°C): ** = 14.5 (GaCH2CH2CH2*C*H3), 16.4 (Ga*C*H2CH2CH2CH3), 29.1 (GaCH2*C*H2CH2CH3), 30.9 (GaCH2C*H*2*C*H2CH3), 32.5 (Sb-C(*C*H3)3), 33.0 (Sb-*C*(CH3)3). EI-MS (m/z, %) 292 (30) [*n*-Bu3Sb+], 240 (50) [*n*-Bu3Ga+], 57 (100) [Bu+].

**(*t*-Bu3)Ga(Sb(*n*-Pr)3) (6)**: Elemental analysis (C21H48GaSb, M = 492.1 g/mol): found (calc.): C: 51.17 (51.26); H: 9.73 (9.83). mp: 56°C. 1H NMR (300 MHz, C6D5H, 25°C): ** = 0.89 (t, 3JHH = 7.0 Hz, 3H, SbCH2CH2*CH*3), 1.32 (s, 9H, *t*-Bu), 1.35 – 1.52 (m, 4H, Sb*CH*2CH2CH3 and SbCH2*CH*2CH3). 13C{1H} NMR (80 MHz, C6D5H, 25°C): ** = 16.8 (Sb*C*H2CH2CH3), 18.5 (SbCH2CH2*C*H3), 21.0 (SbCH2*C*H2CH3), 27.3 (Ga-*C*(CH3)3), 33.6 (Ga-C(*C*H3)3). EI-MS (m/z, %) 250 (35) [*n*-Pr3Sb+], 240 (45) [*t*-Bu3Ga+], 57 (100) [*t*-Bu+].

**(*t*-Bu3)Ga(Sb(*i*-Pr)3) (7)**: Elemental analysis (C21H48GaSb, M = 492.1 g/mol): found (calc.): C: 51.23 (51.26); H: 9.78 (9.83). mp: 64°C. 1H NMR (300 MHz, C6D5H, 25°C): ** = 1.23 (s, 9H, *t*-Bu), 1.25 (d, 3JHH = 7.0 Hz, 6H, Sb-CH-(*CH3*)2), 1.77 (sept, 3JHH = 7.0 Hz, 1H, Sb-*CH*-(CH3)2). 13C{1H} NMR (80 MHz, C6D5H, 25°C): ** = 18.1 (Sb-*C*H-(CH3)2), 22.7 (Sb-CH-(*C*H3)2), 30.0 (Ga-*C*(CH3)3), 31.1 (Ga-C(*C*H3)3). EI-MS (m/z, %) 250 (20) [*i*-Pr3Sb+], 240 (45) [*t*-Bu3Ga+], 57 (100) [*t*-Bu+].

**(*t*-Bu3)Ga(Sb(*t*-Bu)3) (8)**: Elemental analysis (C24H54GaSb, M = 534.1 g/mol): found (calc.): C: 53.88 (53.97); H: 10.15 (10.19). mp: 37°C. 1H NMR (300 MHz, C6D5H, 25°C): ** = 1.16 (s, 9H, Ga*t*-Bu), 1.31 (s, 9H, Sb*t*-Bu). 13C{1H} NMR (80 MHz, C6D5H, 25°C): ** = 31.1 (Ga-C(*C*H3)3), 31.3 (Sb-*C*(CH3)3), 31.5 (Ga-*C*(CH3)3), 32.6 (Sb-C(*C*H3)3). EI-MS (m/z, %) 292 (25) [*t*-Bu3Sb+], 240 (30) [*t*-Bu3Ga+], 57 (100) [*t*-Bu+].
